# Supplementary material for: Favorable morphology and compositional distribution enable efficient and stable quasi-2D Dion–Jacobson perovskite solar cells
Source: Royal Society of Chemistry journal article supplement (doi:10.1039/d2ta09940c), 2023-01-01
Supplement: d2ta09940c1.pdf [file d2ta09940c1.pdf]

# Favorable Morphology and Compositional Distribution Enables Efficient and Stable Quasi-2D Dion-Jacobson Perovskite Solar Cells

Chao Zhou,<sup>1,2</sup> Yonglei Han,<sup>1,2</sup> Lei Cheng,<sup>3</sup> Ruijie Ma\*,<sup>3</sup> Fei Wang,<sup>1</sup> Shuchen Weng,<sup>1</sup> Guicheng Yu,<sup>1</sup> Fang Lin,<sup>1</sup> Kang Zhou,<sup>1</sup> Hanlin Hu,<sup>1</sup> Xiao Liang,<sup>1</sup> Yongfei Wang\*,<sup>2</sup> Haoran Lin\*,<sup>1</sup> Gang Li\*<sup>3</sup>

1. Hoffmann Institute of Advanced Materials, Shenzhen Polytechnic, 7098 Liuxian Blvd, Nanshan District, Shenzhen, 518055, China  
Email: [hlin@szpt.edu.cn](mailto:hlin@szpt.edu.cn)
2. School of Materials and Metallurgy, University of Science and Technology Liaoning, 185 Qianshan Zhong Road, Anshan, 114051, China  
Email: [wyf8307@ustl.edu.cn](mailto:wyf8307@ustl.edu.cn)
3. Department of Electronic and Information Engineering, Research Institute for Smart Energy (RISE), Guangdong-Hong Kong-Macao (GHM) Joint Laboratory for Photonic-Thermal-Electrical Energy Materials and Devices, The Hong Kong Polytechnic University, Hung Hom, Kowloon, Hong Kong, 999077, China  
Email: [ruijie.ma@polyu.edu.hk](mailto:ruijie.ma@polyu.edu.hk); [gang.w.li@polyu.edu.hk](mailto:gang.w.li@polyu.edu.hk)

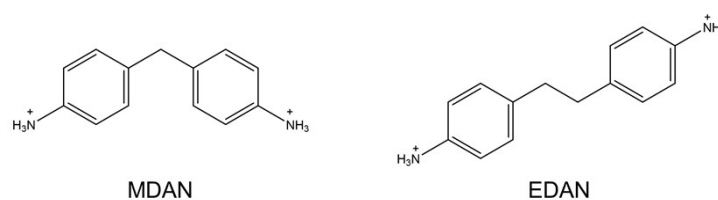

Scheme S1. The molecular structures of MDAN and EDAN.

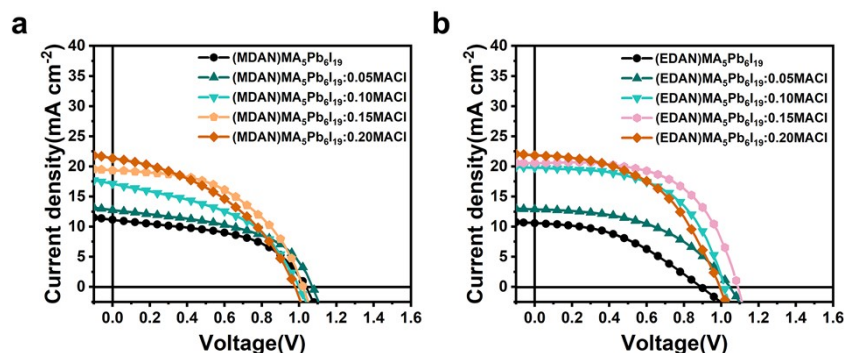

Figure S1. (a,b) The  $J$ - $V$  curves of devices based on (MDAN/EDAN) $\text{MA}_3\text{Pb}_6\text{I}_{19}$  with different MACl additive

content, respectively.

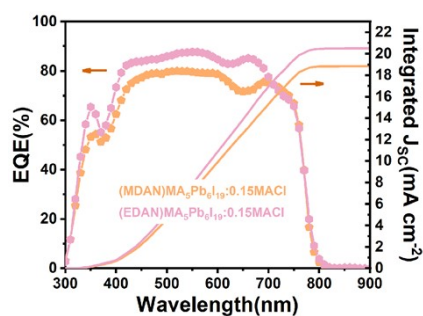

**Figure S2.** External quantum efficiency (EQE) spectra and their integrated current density curves of (MDAN/EDAN)MA<sub>5</sub>Pb<sub>6</sub>I<sub>19</sub>:0.15MACl devices.

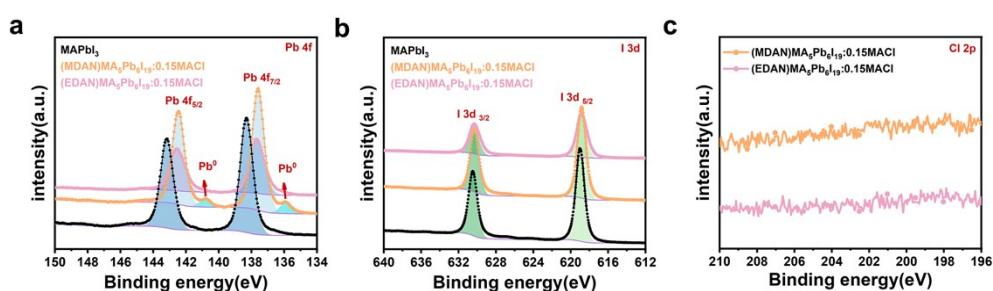

**Figure S3.** The (a) Pb 4f and (b) I 3d peaks in XPS spectra of MAPbI<sub>3</sub> and (MDAN/EDAN)MA<sub>5</sub>Pb<sub>6</sub>I<sub>19</sub>:0.15MACl films. (c) Cl 2p core level XPS spectra of (MDAN/EDAN)MA<sub>5</sub>Pb<sub>6</sub>I<sub>19</sub>:0.15MACl films.

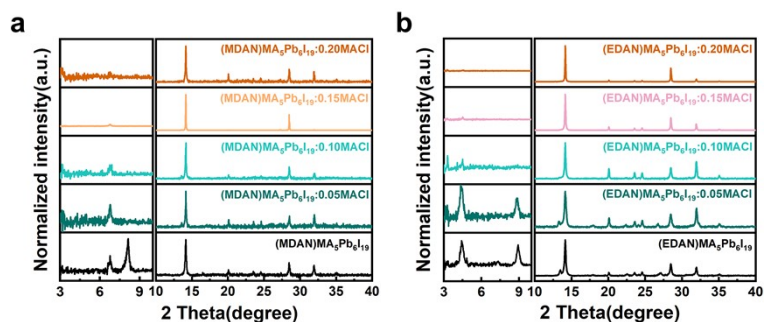

**Figure S4.** (a,b) The XRD spectra of (MDAN/EDAN)MA<sub>5</sub>Pb<sub>6</sub>I<sub>19</sub> films with different MACl additive content.

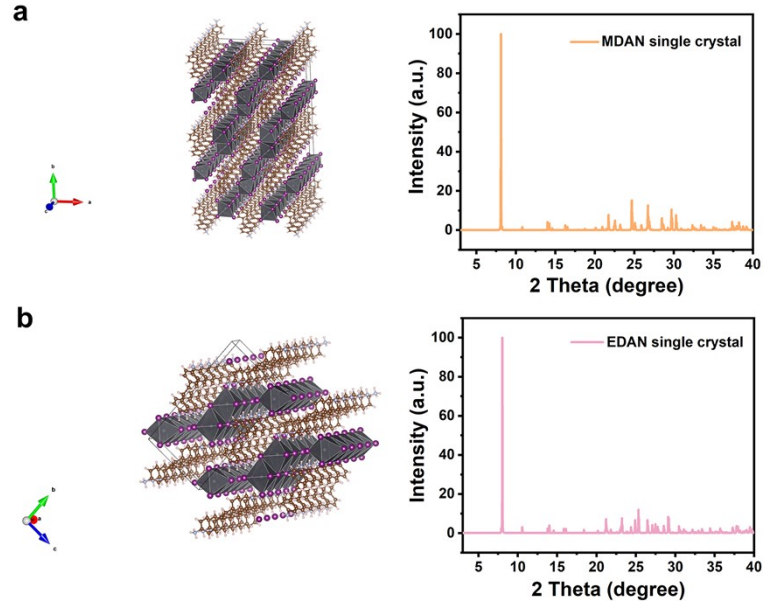

Figure S5. (a,b) The single crystals of (MDAN/EDAN)PbI<sub>3</sub> (n = 1) and corresponding simulated XRD patterns.

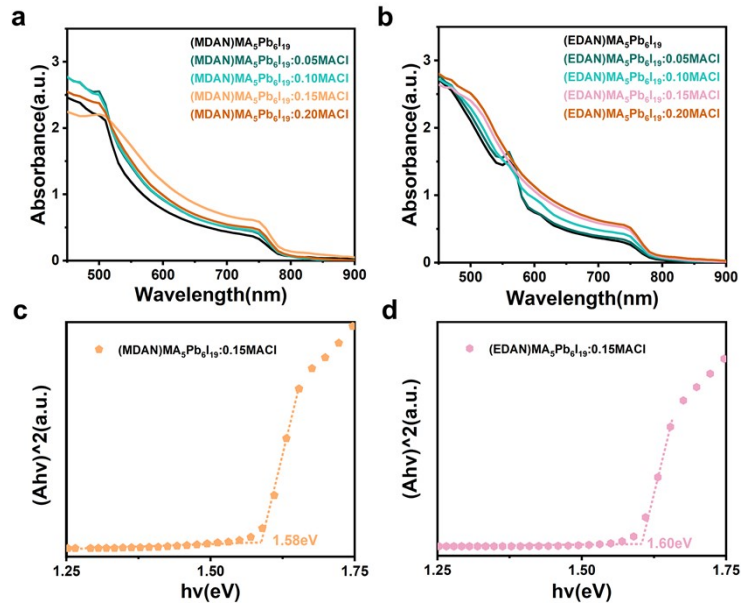

Figure S6. (a,b) The UV-vis absorption spectra of (MDAN/EDAN)MA<sub>5</sub>Pb<sub>6</sub>I<sub>19</sub> films with different MACl additive content, respectively. (c,d) The Tauc plots of (MDAN/EDAN)MA<sub>5</sub>Pb<sub>6</sub>I<sub>19</sub>:0.15MACl, respectively.

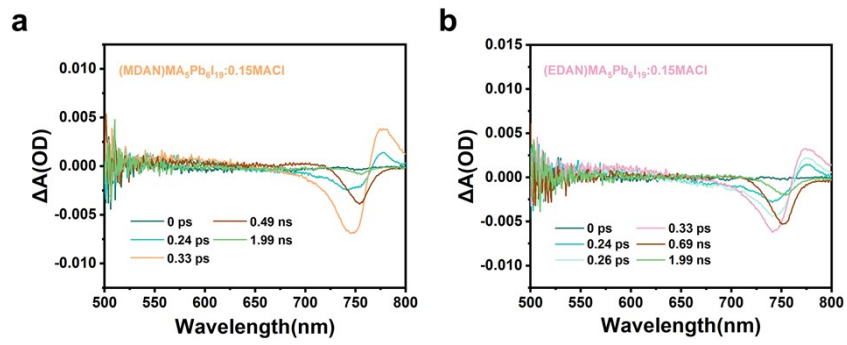

**Figure S7.** (a,b) The TA spectra of (MDAN/EDAN)MA<sub>5</sub>Pb<sub>6</sub>I<sub>19</sub>:0.15MACl films under front excitations at different times.

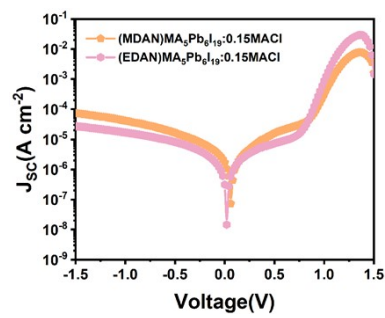

**Figure S8.** The  $J$ - $V$  curves of the (MDAN/EDAN)MA<sub>5</sub>Pb<sub>6</sub>I<sub>19</sub>:0.15MACl devices under dark.

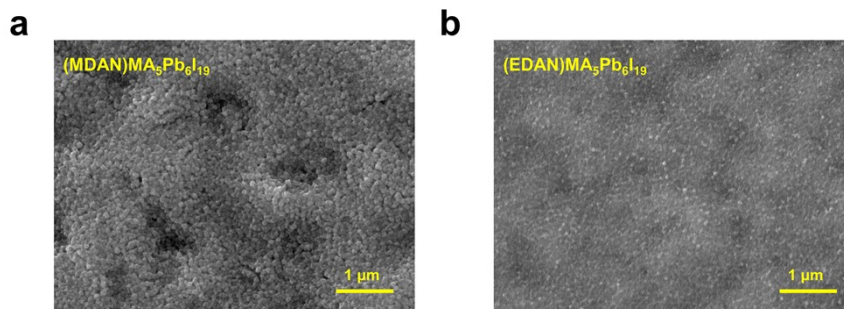

**Figure S9.** (a,b) The SEM image of (MDAN/EDAN)MA<sub>5</sub>Pb<sub>6</sub>I<sub>19</sub> films without MACl additive.

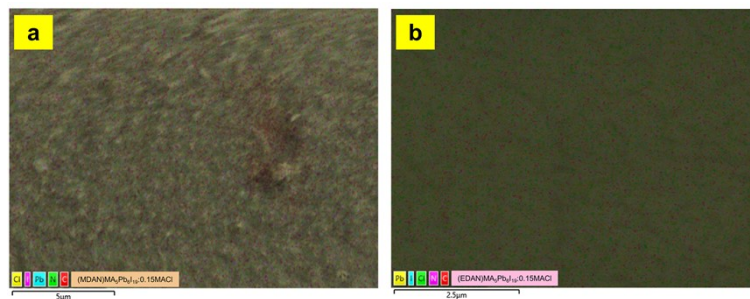

**Figure S10.** The EDS distribution images of the (MDAN/EDAN)MA<sub>5</sub>Pb<sub>6</sub>I<sub>19</sub>:0.15MACl films.

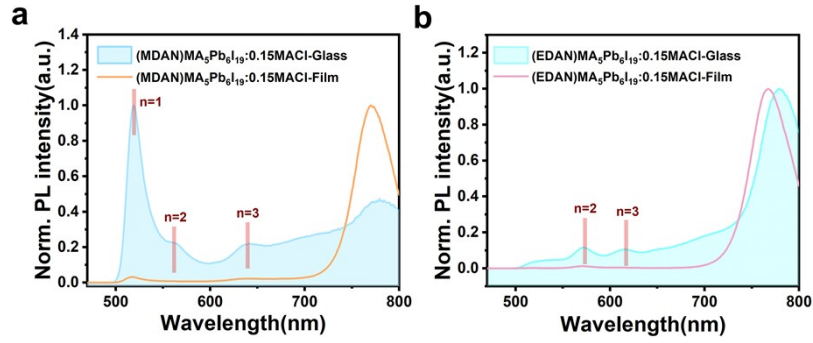

Figure S11. The PL spectrum of (MDAN/EDAN)MA<sub>5</sub>Pb<sub>6</sub>I<sub>19</sub>:0.15MACl films excited from glass and film sides.

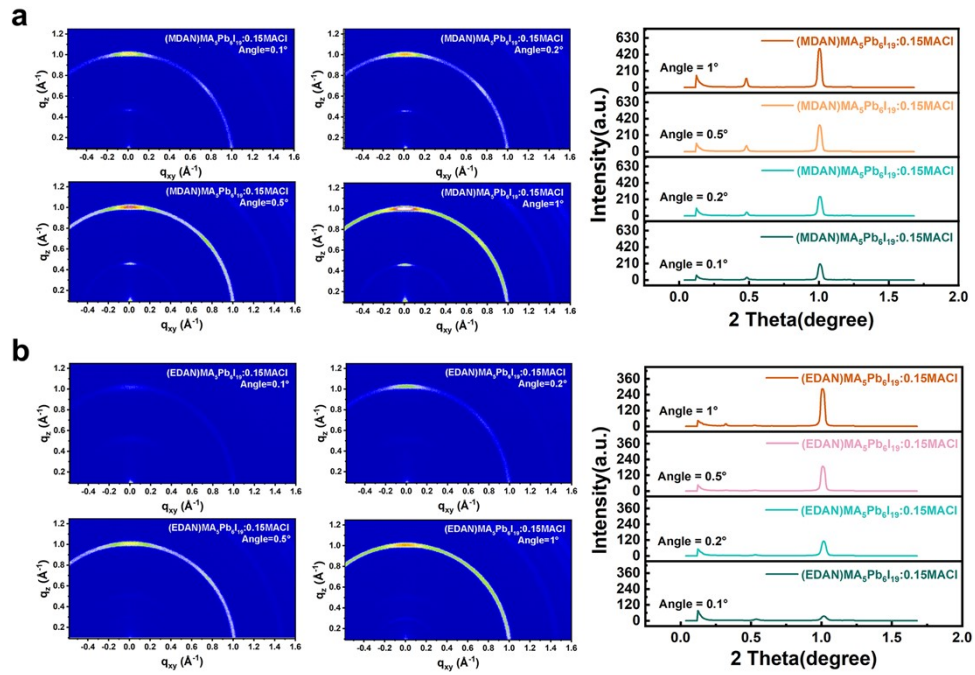

Figure S12. (a,b) The GIWAXS patterns of (MDAN/EDAN)MA<sub>5</sub>Pb<sub>6</sub>I<sub>19</sub>:0.15MACl films with different incident illumination angles and corresponding 2D GIWAXS profiles patterns along out of the plane direction.

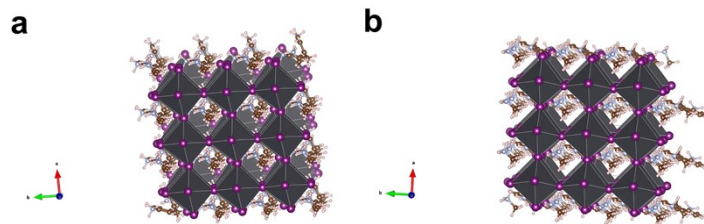

Figure S13. The simulated crystal structure of (a) (MDAN)MA<sub>5</sub>Pb<sub>6</sub>I<sub>19</sub> and (b) (EDAN)MA<sub>5</sub>Pb<sub>6</sub>I<sub>19</sub> along the c-axis.

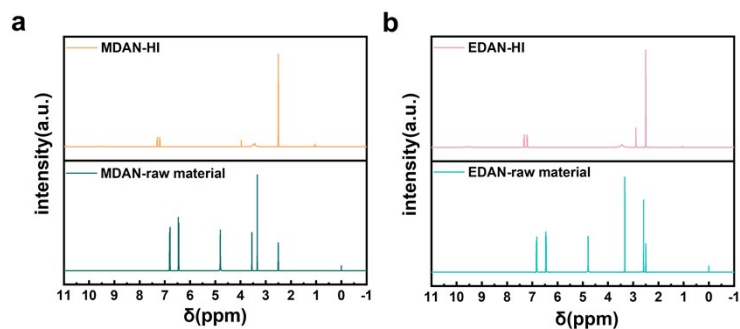

**Figure S14.** The  $^1\text{H}$  NMR spectra of (a) MDAN and MDANI<sub>2</sub> and (b) EDAN and EDANI<sub>2</sub> in  $d_6$ -DMSO.

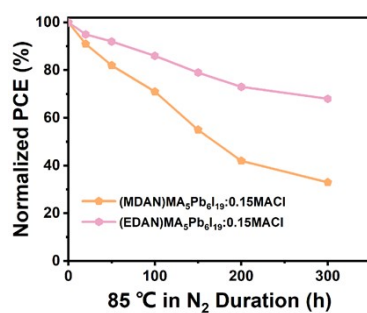

**Figure S15.** The thermal stability measurement of (MDAN)MA<sub>5</sub>Pb<sub>6</sub>I<sub>19</sub>:0.15MACl and (EDAN)MA<sub>5</sub>Pb<sub>6</sub>I<sub>19</sub>:0.15MACl devices stored in nitrogen at 85 °C.

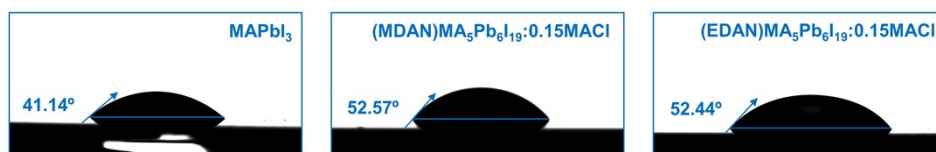

**Figure S16.** The photo image of water on MAPbI<sub>3</sub>, (MDAN/EDAN)MA<sub>5</sub>Pb<sub>6</sub>I<sub>19</sub>:0.15MACl films.

**Table S1.** The solar cell device parameters based on (MDAN)MA<sub>5</sub>Pb<sub>6</sub>I<sub>19</sub> with different MACl content. The average values are calculated from 20 devices.

| Nominal Composition                                             | $V_{OCave}$<br>(V) | $J_{SCave}$<br>(mA cm <sup>-2</sup> ) | FF <sub>ave</sub><br>(%) | PCE <sub>ave</sub><br>(%) | PCE <sub>max</sub><br>(%) |
|-----------------------------------------------------------------|--------------------|---------------------------------------|--------------------------|---------------------------|---------------------------|
| (MDAN)MA <sub>5</sub> Pb <sub>6</sub> I <sub>19</sub>           | 1.03               | 10.67                                 | 48.3                     | 5.33                      | 5.76                      |
| (MDAN)MA <sub>5</sub> Pb <sub>6</sub> I <sub>19</sub> :0.05MACl | 1.08               | 12.06                                 | 49.4                     | 6.43                      | 6.69                      |
| (MDAN)MA <sub>5</sub> Pb <sub>6</sub> I <sub>19</sub> :0.10MACl | 1.01               | 17.47                                 | 44.3                     | 7.65                      | 7.80                      |
| (MDAN)MA <sub>5</sub> Pb <sub>6</sub> I <sub>19</sub> :0.15MACl | 0.98               | 19.76                                 | 48.8                     | 9.31                      | 9.65                      |
| (MDAN)MA <sub>5</sub> Pb <sub>6</sub> I <sub>19</sub> :0.20MACl | 0.94               | 19.58                                 | 41.8                     | 7.71                      | 8.60                      |

**Table S2.** The solar cell device parameters based on (EDAN)MA<sub>5</sub>Pb<sub>6</sub>I<sub>19</sub> with different MACl content. The average values are calculated from 20 devices.

| Nominal Composition                                             | $V_{OCave}$<br>(V) | $J_{SCave}$<br>(mA cm <sup>-2</sup> ) | FF <sub>ave</sub><br>(%) | PCE <sub>ave</sub><br>(%) | PCE <sub>max</sub><br>(%) |
|-----------------------------------------------------------------|--------------------|---------------------------------------|--------------------------|---------------------------|---------------------------|
| (EDAN)MA <sub>5</sub> Pb <sub>6</sub> I <sub>19</sub>           | 0.90               | 9.60                                  | 42.24                    | 3.61                      | 3.84                      |
| (EDAN)MA <sub>5</sub> Pb <sub>6</sub> I <sub>19</sub> :0.05MACl | 1.01               | 12.17                                 | 47.13                    | 5.81                      | 6.45                      |
| (EDAN)MA <sub>5</sub> Pb <sub>6</sub> I <sub>19</sub> :0.10MACl | 1.05               | 16.09                                 | 53.94                    | 9.20                      | 11.0                      |
| (EDAN)MA <sub>5</sub> Pb <sub>6</sub> I <sub>19</sub> :0.15MACl | 1.05               | 21.45                                 | 50.64                    | 11.6                      | 13.2                      |
| (EDAN)MA <sub>5</sub> Pb <sub>6</sub> I <sub>19</sub> :0.20MACl | 0.95               | 21.87                                 | 46.07                    | 10.2                      | 10.8                      |

**Table S3.** The single crystal data and refinement of (MDAN)PbI<sub>3</sub>(n = 1).

|                              |                                                                               |                                                                                 |
|------------------------------|-------------------------------------------------------------------------------|---------------------------------------------------------------------------------|
| <b>Bond precision:</b>       | c-c = 0.0429 Å                                                                | Wavelength = 1.34139                                                            |
|                              |                                                                               | a = 25.2869(12) Å                                                               |
|                              |                                                                               | b = 42.894(2) Å                                                                 |
|                              |                                                                               | c = 4.5074(2) Å                                                                 |
| <b>Cell:</b>                 |                                                                               | alpha = 90 °                                                                    |
|                              |                                                                               | beta = 90 °                                                                     |
|                              |                                                                               | gamma = 90 °                                                                    |
| <b>Temperature:</b>          |                                                                               | 193 k                                                                           |
|                              | <b>Calculated</b>                                                             | <b>Reported</b>                                                                 |
| <b>Volume</b>                | 4889.0(4) Å <sup>3</sup>                                                      | 4889.0(4) Å <sup>3</sup>                                                        |
| <b>Space group</b>           | F d d 2                                                                       | F d d 2                                                                         |
| <b>Hall group</b>            | F 2 -2d                                                                       | F 2 -2d                                                                         |
| <b>Moiety formula</b>        | 2(PbI <sub>3</sub> ), C <sub>13</sub> H <sub>16</sub> N <sub>2</sub>          | Pb <sub>2</sub> I <sub>6</sub> , C <sub>13</sub> H <sub>16</sub> N <sub>2</sub> |
| <b>Sum formula</b>           | C <sub>13</sub> H <sub>16</sub> I <sub>6</sub> N <sub>2</sub> Pb <sub>2</sub> | C <sub>13</sub> H <sub>16</sub> I <sub>6</sub> N <sub>2</sub> Pb <sub>2</sub>   |
| <b>Mr</b>                    | 1376.08                                                                       | 1376.06                                                                         |
| <b>Dx, g cm<sup>-3</sup></b> | 3.739                                                                         | 3.739                                                                           |
| <b>Z</b>                     | 8                                                                             | 8                                                                               |

|                             |              |              |
|-----------------------------|--------------|--------------|
| <b>Mu (mm<sup>-1</sup>)</b> | 58.693       | 58.693       |
| <b>F000</b>                 | 4720.0       | 4720.0       |
| <b>F000'</b>                | 4663.87      |              |
| <b>h, k, lmax</b>           | 30, 50, 5    | 30, 50, 5    |
| <b>Nref</b>                 | 2252 [1279]  | 2167         |
| <b>Tmin, Tmax</b>           | 0.001, 0.003 | 0.012, 0.100 |
| <b>Tmin'</b>                | 0.000        |              |

**Table S4.** The single crystal data and refinement of (EDAN)PbI<sub>3</sub>(n = 1).

|                              |                                                    |                                                                                 |
|------------------------------|----------------------------------------------------|---------------------------------------------------------------------------------|
| <b>Bond precision:</b>       | c-c = 0.0102 Å                                     | Wavelength = 0.71073                                                            |
|                              |                                                    | a = 4.5872(2) Å                                                                 |
|                              |                                                    | b = 22.3629(10) Å                                                               |
| <b>Cell:</b>                 |                                                    | c = 12.7917(6) Å                                                                |
|                              |                                                    | alpha = 90 °                                                                    |
|                              |                                                    | beta = 98.823(2) °                                                              |
|                              |                                                    | gamma = 90 °                                                                    |
| <b>Temperature:</b>          |                                                    | 193 k                                                                           |
|                              | <b>Calculated</b>                                  | <b>Reported</b>                                                                 |
| <b>Volume</b>                | 1296.77(10) Å <sup>3</sup>                         | 1296.77(10) Å <sup>3</sup>                                                      |
| <b>Space group</b>           | P 21/n                                             | P 1 21/n 1                                                                      |
| <b>Hall group</b>            | -P 2yn                                             | -P 2yn                                                                          |
| <b>Moiety formula</b>        | PbI <sub>3</sub> , C <sub>7</sub> H <sub>9</sub> N | Pb <sub>2</sub> I <sub>6</sub> , C <sub>14</sub> H <sub>18</sub> N <sub>2</sub> |
| <b>Sum formula</b>           | C <sub>7</sub> H <sub>9</sub> NPbI <sub>3</sub>    | C <sub>14</sub> H <sub>18</sub> N <sub>2</sub> Pb <sub>2</sub> I <sub>6</sub>   |
| <b>Mr</b>                    | 695.05                                             | 1390.08                                                                         |
| <b>Dx, g cm<sup>-3</sup></b> | 3.560                                              | 3.560                                                                           |
| <b>Z</b>                     | 4                                                  | 2                                                                               |
| <b>Mu (mm<sup>-1</sup>)</b>  | 20.110                                             | 20.110                                                                          |
| <b>F000</b>                  | 1196.0                                             | 1196.0                                                                          |
| <b>F000'</b>                 | 1178.25                                            |                                                                                 |
| <b>h, k, lmax</b>            | 5, 29, 16                                          | 5, 29, 16                                                                       |
| <b>Nref</b>                  | 2981                                               | 2975                                                                            |
| <b>Tmin, Tmax</b>            | 0.092, 0.134                                       | 0.027, 0.095                                                                    |
| <b>Tmin'</b>                 | 0.059                                              |                                                                                 |

**Table S5.** The EDS distribution of elements total spectrum of (MDAN)MA<sub>5</sub>Pb<sub>6</sub>I<sub>19</sub>:0.15MACl films.

| Element | Apparent concentration | Wt % | Wt % <i>Sigma</i> |
|---------|------------------------|------|-------------------|
| C       | 11.2                   | 11.6 | 0.05              |
| N       | 15.1                   | 3.37 | 0.06              |
| Cl      | 0.03                   | 0.01 | 0.02              |
| I       | 90.3                   | 53.2 | 0.10              |
| Pb      | 53.9                   | 31.9 | 0.10              |



|               |     |
|---------------|-----|
| Total content | 100 |
|---------------|-----|

**Table S6.** The EDS distribution of elements total spectrum of (EDAN)MA<sub>5</sub>Pb<sub>6</sub>I<sub>19</sub>:0.15MnCl films.

| Element       | Apparent concentration | Wt % | Wt % <i>Sigma</i> |
|---------------|------------------------|------|-------------------|
| C             | 8.47                   | 8.54 | 0.06              |
| N             | 14.7                   | 2.96 | 0.06              |
| Cl            | 1.22                   | 0.52 | 0.03              |
| I             | 105.1                  | 57.7 | 0.13              |
| Pb            | 54.5                   | 30.3 | 0.13              |
| Total content |                        | 100  |                   |

**Table S7.** The PL lifetimes of (MDAN/EDAN)MA<sub>5</sub>Pb<sub>6</sub>I<sub>19</sub>:0.15MnCl films.

|                                                                 | A <sub>1</sub> | τ <sub>1</sub> /ns | A <sub>2</sub> | τ <sub>2</sub> /ns |
|-----------------------------------------------------------------|----------------|--------------------|----------------|--------------------|
| (MDAN)MA <sub>5</sub> Pb <sub>6</sub> I <sub>19</sub> :0.15MnCl | 0.95           | 7.4                | 0.05           | 32                 |
| (EDAN)MA <sub>5</sub> Pb <sub>6</sub> I <sub>19</sub> :0.15MnCl | 0.85           | 21                 | 0.15           | 89                 |
